# Supplementary material for: Vanadium-density-dependent thermal decomposition of NH4HSO4 on V2O5/TiO2 SCR catalysts
Source: Royal Society of Chemistry journal article supplement (doi:10.1039/c9cy00900k), 2019-01-01
Supplement: c9cy00900k1.pdf [file c9cy00900k1.pdf]

## Supporting

### **Vanadium-density-dependent thermal decomposition of NH<sub>4</sub>HSO<sub>4</sub> on V<sub>2</sub>O<sub>5</sub>/TiO<sub>2</sub> SCR catalysts**

Tong Tong<sup>a,b</sup>, Jianjun Chen<sup>a,b\*</sup>, Shangchao Xiong<sup>a,b</sup>, Wenhao Yang<sup>a,b</sup>, Qilei Yang<sup>a,b</sup>, Lijun Yang<sup>c</sup>, Yue  
Peng<sup>a,b</sup>, Zhiming Liu<sup>c</sup>, Junhua Li<sup>a,b</sup>

*<sup>a</sup> State Key Joint Laboratory of Environment Simulation and Pollution Control*

*School of Environment, Tsinghua University, Beijing, 100084, China*

*b. National Engineering Laboratory for Multi Flue Gas Pollution Control Technology and*

*Equipment, School of Environment, Tsinghua University, Beijing, 100084, China*

*c. State Key Laboratory of Chemical Resource Engineering, Beijing University of Chemical*

*Technology, Beijing 100029, China*

*\*Corresponding Author: Jianjun Chen*

*Phone: +86 10 62771093; fax: +86 10 62771093;*

*E-mail addresses: [chenjianjun@tsinghua.edu.cn](mailto:chenjianjun@tsinghua.edu.cn)*

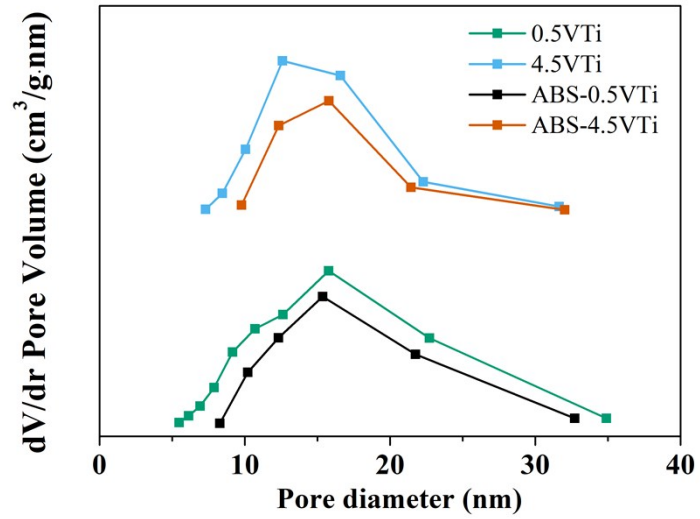

**Fig.S1.** BJH pore size distributions of the fresh catalysts and ABS-deposited catalysts.

Figure S1 shows the pore size distribution by BJH method of the catalysts. It can be seen that the pore volume corresponding to each pore size of the catalysts decreases, indicating that ABS was uniformly deposited in the catalysts pores.

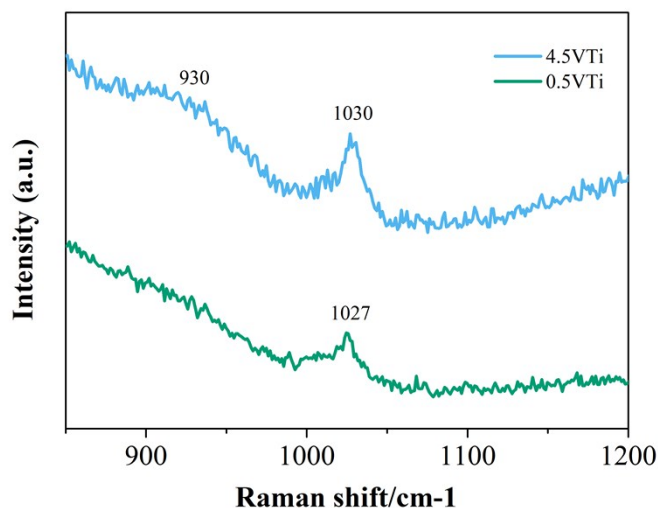

**Fig.S2.** Raman spectra of the fresh catalysts and ABS-deposited catalyst.

The Raman band at 1027 and 1030  $\text{cm}^{-1}$  corresponds to the vibration of the terminal V=O bond. With the increase of oligomeric surface VOx sites, the shift from 1027 to 1030  $\text{cm}^{-1}$  is attributed to the vibrational coupling of adjacent V=O bonds[1, 2]. The broad Raman band at 920–940  $\text{cm}^{-1}$  on the 4.5V catalyst is arises from the vibrations of the bridging V–O–Ti bonds[3, 4].

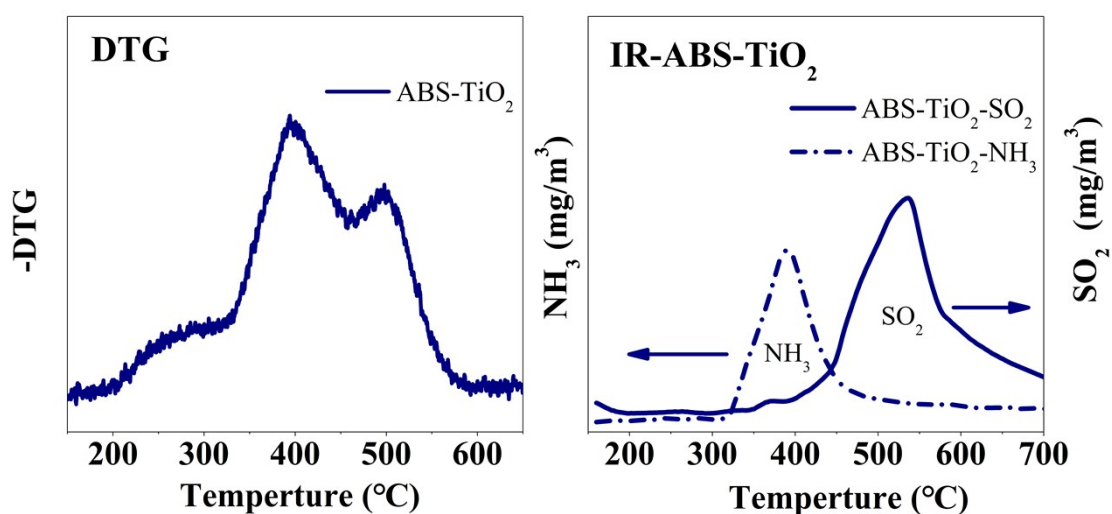

**Fig.S3.** DTG-IR of ABS-deposited  $\text{TiO}_2$  catalysts.

The decomposition of ABS on  $V_2O_5/TiO_2$  catalysts could be described by the following equations:

For the  $V_2O_5/TiO_2$  catalyst with relatively a low vanadia loading:

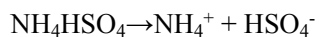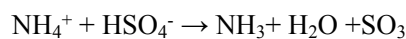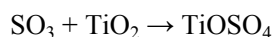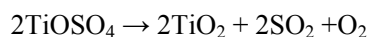

For the  $V_2O_5/TiO_2$  catalyst with relatively a high vanadia loading:

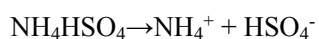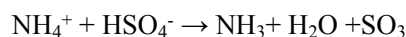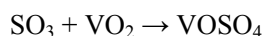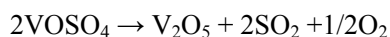

## References

[s1] Vuurman, W. M.A, Structural determination of supported  $V_2O_5-WO_3/TiO_2$  catalysts by in situ

Raman spectroscopy and x-ray photoelectron spectroscopy J. Phy. Chem. (1991).

[s2] S.K. Du, Surface structures of supported tungsten oxide catalysts under dehydrated conditions, J.

Mol. Catal. A: Chem. 106 (1996) 93-102.

[s3] S.F. Vyboishchikov, J. Sauer,  $(V_2O_5)_n$  Gas-Phase Clusters ( $n=1-12$ ) Compared to  $V_2O_5$  Crystal:

DFT Calculations, J. Phys. Chem. A 105 (2001) 8588-8598.

[s4] S. Guimond, M.A. Haija, S. Kaya, J. Lu, J. Weissenrieder, S. Shaikhutdinov, H. Kuhlenbeck, H.J.

Freund, J. Döbler, J.J.T.i.C. Sauer, Vanadium oxide surfaces and supported vanadium oxide

nanoparticles, Top. Catal. 38 (2006) 117-125.
